# 1 **Resource conservation manifests in the genetic code**

2 Liat Shenhav<sup>1,\*</sup> and David Zeevi<sup>2,\*^</sup>

3

4 <sup>1</sup>Department of Computer Science, University of California Los Angeles, Los Angeles, CA, USA

5 <sup>2</sup>Center for Studies in Physics and Biology, Rockefeller University, New York, NY, USA

6 \*denotes equal contribution

7 ^dzeevi@rockefeller.edu

8

## 9 **Abstract**

10 Ocean microbes are responsible for about 50% of primary production on Earth, and are strongly  
11 affected by environmental resource availability. However, selective forces resulting from  
12 environmental conditions are not well understood. We studied selection by examining single-  
13 nucleotide variants in the marine environment, and discovered strong purifying selective forces  
14 exerted across marine microbial genes. We present evidence indicating that this selection is  
15 driven by the environment, and especially by nitrogen availability. We further corroborate that  
16 nutrient availability drives this 'resource-driven' selection by showing stronger selection on highly  
17 expressed and extracellular genes, that are more resource-consuming. Finally, we show that the  
18 standard genetic code, along with amino acid abundances, facilitates nutrient conservation by  
19 providing robustness to mutations that increase nitrogen and carbon consumption. Notably, this  
20 robustness generalizes to multiple taxa across all domains of life, including the Human genome,  
21 and manifests in the code structure itself. Overall, we uncover overwhelmingly strong purifying  
22 selective pressure across marine microbial life that may have contributed to the structure of our  
23 genetic code.

## 24 **Introduction**

25 Ocean microbes, the largest group of organisms on the planet<sup>1</sup>, are involved in key cycling of  
26 nutrients that make up all living systems. They account for nearly half of the carbon compound  
27 synthesis on Earth, thereby producing about 50% of breathable oxygen<sup>2</sup>. These marine microbes  
28 also cycle nutrients to perform numerous other important roles, such as biodegradation of  
29 complex organic material and fixation of atmospheric nitrogen, while flourishing in a wide range  
30 of environments with varying ambient conditions such as oxygen and nitrogen levels, light and  
31 temperature<sup>3,4</sup>. Nonetheless, and despite their importance in global energy flux and nutrient  
32 cycling, evolutionary forces acting on ocean microbes are not fully understood<sup>4</sup>.

33 With rapidly changing climate and environment, understanding the types of stress exerted on  
34 microbes in marine habitats is of paramount importance. Recent studies<sup>4,5</sup> provide evidence of  
35 high variability in the core genomic properties of marine microbes, including GC content and  
36 genome size, suggesting that this variability is linked to the concentrations of nutrients in the  
37 environment. Nitrogen and carbon are major limiting factors in the marine environment and their  
38 concentrations are typically inversely correlated<sup>6</sup>. It was shown that in low-nitrogen environments  
39 there is lower incorporation of nitrogen-rich side chains into proteins, a strong A+T bias in  
40 nucleotide sequences, and smaller genome sizes, suggesting that nitrogen conservation is a  
41 strong selective force<sup>7</sup>. An opposite trend was shown for carbon<sup>4</sup>. Previous studies<sup>7,8</sup> identified a  
42 purifying selective pressure associated with resource conservation, which we term 'resource-  
43 driven' selection. Such 'resource-driven' selection against incorporation of nutrients in a resource-  
44 limited environment may be further propagated by the high effective population sizes observed in  
45 the open ocean, where even slightly deleterious mutations are rapidly selected against<sup>9</sup>.  
46 Notwithstanding, the ways in which resource-driven selection manifests in protein-coding  
47 sequences are not fully elucidated.

48 To illuminate mechanisms through which resource-driven selection affects protein-coding genes,  
49 we amalgamated measurements of environmental conditions with publicly available marine  
50 metagenomic data from oceanic habitats across the globe (Fig. 1A)<sup>3,10</sup>. We analyzed purifying  
51 selection in 746 such marine samples by devising a tailored computational pipeline examining  
52 single nucleotide polymorphisms. This enabled us to systematically associate purifying selection  
53 with related environmental measurements. We revealed a strong purifying selective pressure,  
54 which seems to be acting in a similar fashion across most marine microbial genes. This purifying  
55 selection is associated with environmental nutrient concentrations, specifically nitrate. We further  
56 show that resource-consuming genes, which are highly expressed or code for extracellular  
57 proteins, are under stronger resource-driven selection as compared to other, less resource-  
58 consuming genes. We analyze mutations in nitrate-rich as compared to nitrate-poor waters and  
59 show that this selection is likely characterized by specific amino acid preferences depending on  
60 environmental conditions. Finally, we demonstrate that the distribution of amino acids, along with  
61 the structure of the genetic code, provides robustness against random mutations that increase  
62 carbon and nitrogen incorporation into protein sequences. We extend this observation to codon  
63 distributions across many diverse life forms, and suggest that nutrient conservation is encoded in  
64 the standard genetic code, which is robust to mutations that result in higher nitrogen and carbon  
65 utilization.

## 66 **Results**

67

### 68 **Single nucleotide polymorphisms in marine microbial genes reveal strong purifying** 69 **selection**

70 To better understand the underlying mechanisms governing resource-driven selection acting on  
71 marine microbes, we sought to characterize, at the single nucleotide level, how coding sequences  
72 of marine microbes are affected by resource availability in their environment. To this end, we  
73 devised a computational pipeline that calculates metrics of selection from marine metagenomic  
74 samples (Fig. 1B). We downloaded metagenomic sequencing data from 746 samples from the  
75 Tara oceans<sup>3</sup> (n=136); bioGEOTRACES<sup>10</sup> (n=480); Hawaii Ocean Time-series<sup>10</sup> (HOT; n=68);  
76 and Bermuda Atlantic TimeSeries<sup>10</sup> (BATS; n=62) expeditions (Fig. 1A; Methods). We aligned  
77 these reads to the Ocean Microbiome Reference Gene Catalog (OM-RGC)<sup>3</sup> and searched for  
78 single nucleotide polymorphisms (SNPs) in genes that had sufficient high-quality coverage (Fig.  
79 1B; Methods). Overall, we found 71,921,864 high-confidence SNPs in 1,590,843 genes.

80 Next, to quantify purifying selection on different gene functions, we annotated genes from the OM-  
81 RGC database to inform their functional group membership with either KEGG orthology (KO) or  
82 eggNOG orthologous group (OG; Methods). We then calculated, using called SNPs per  
83 orthologous group in each of the samples, the ratio of non-synonymous to synonymous  
84 polymorphisms<sup>11,12</sup> (pN/pS; Methods). We used pN/pS ratio to approximate purifying selection at  
85 the population level as dN/dS ratios, which are typically used to characterize these stresses<sup>12</sup>,  
86 were not applicable in this setting (Methods). pN/pS quantifies the rate of nonsynonymous  
87 polymorphisms (pN), which lead to a change in the resulting amino acid, normalized to the rate  
88 of synonymous polymorphisms (pS), which maintain the coded amino acid.

89 As pN/pS is a proxy for the magnitude of purifying selection exerted on protein-coding sequences,  
90 we sought to utilize it to evaluate the selective forces acting on marine microbial functions. The  
91 rate of non-synonymous to synonymous polymorphisms was on average, across samples, 0.074  
92 (CI [0.072, 0.075]) across all OGs and 0.079 (CI [0.077, 0.080]) across all KOs, similar to  
93 previously reported pN/pS ratios across different microbial genomes in the human microbiome<sup>11</sup>  
94 (Fig. 1C,D). With values close to zero indicating very strong selection against amino acid changes,  
95 these findings imply that purifying selection is on the same scale in free-living marine organisms  
96 as compared to host-associated microbes in the human gut. While gut microbes are expected to  
97 be under strong purifying selection in order to keep functioning in the host-associated niche<sup>13</sup>, the  
98 source of this strong purifying selection on ocean microbes is not well understood.

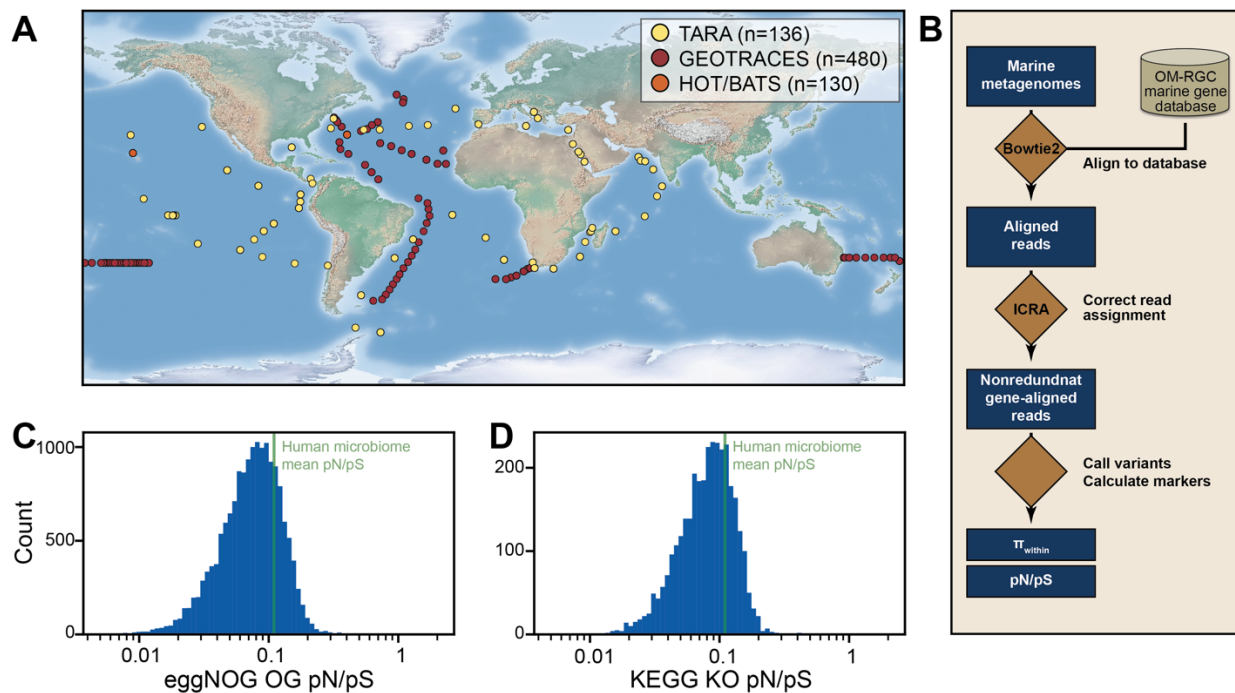

100 **Figure 1. Calculation of evolutionary metrics from marine metagenomic samples.** (A)  
101 Geographical overview of the samples used in this study. (B) Illustration of our computational pipeline.  
102 (C,D) Histogram of pN/pS rates for eggNOG orthologous groups (OG; C) and KEGG orthologs (KO;  
103 D) across all marine samples.

## 104 **Strong resource-driven selection apparent across marine microbial genes**

105 To quantify the effects of environmental conditions on selective forces acting on marine microbial  
106 genes, we extracted measurements regarding the environment in which each sample was taken.  
107 This included the depth of the sample, water temperature and salinity, as well as concentration of  
108 the key molecules nitrate, nitrite, oxygen, phosphate and silicate (Fig. S1A-H; Methods). All these  
109 measurements of environmental conditions are highly correlated with each other (Fig. S1I), and  
110 also presented consistent correlation patterns with pN/pS of many KEGG and eggNOG orthologs  
111 (Fig. S2), with low pN/pS at shallow depths and low nitrate concentrations. We therefore sought  
112 to estimate the overall variance explained by the environment while accounting for these  
113 covariations. To this end, we used a linear mixed model (LMM) with variance components,  
114 commonly used in population genetics<sup>14</sup> (Methods). We defined the environmental covariates as  
115 random effects in order to quantify the fraction of variance in pN/pS that is explained by resource  
116 availability (i.e., environmental explained variance; EEV; Methods). Across both KEGG and  
117 eggNOG orthologs we found that a substantial fraction of the variance in pN/pS can be attributed  
118 to the environment, where across all orthologs this effect is significantly bigger than zero (Fig.  
119 2A,B; Mann-Whitney  $U$  test  $P < 10^{-16}$ ).

120 Different environmental niches may harbor different taxa with different trophic interactions that  
121 could lead to differences in selective pressures. Thus, we sought to ensure that these  
122 associations between pN/pS and the environment are not confounded by organismal differences  
123 across different depths and nitrate concentrations. To this end, we analyzed genes belonging  
124 exclusively to the genus *Synechococcus* (Methods). We calculated pN/pS across all of the coding  
125 sequences combined and found a significant positive correlation with nitrate concentrations  
126 ( $P < 10^{-20}$ ; Fig. S3A). To further validate that this correlation does not stem from the different  
127 effective population sizes in the gradient of environmental nitrogen, we divided the samples into  
128 five identically sized groups, based on environmental nitrate concentrations while constraining the

129 scope of each group to genes present in at least half of the samples. We show that an association  
130 of pN/pS with nitrate extends to specific niches across the nitrocline, i.e., in concentrations higher  
131 than 1  $\mu\text{mol/kg}$  ( $P < 0.05$ ; Fig. S3B). These results demonstrate the existence of pN/pS gradient  
132 as a function of nitrate concentrations, even in a single taxonomic group in a specific  
133 environmental niche. This indicates that correlations of pN/pS with environmental variables are  
134 not driven exclusively by organismal properties or by differences in trophic conditions across  
135 environments, but rather exhibit a significant trend even within a single taxon, in specific niches.

136 Genes are not stand-alone entities, but are rather coded as a sequence in the genome of a  
137 microbe. We therefore accounted for a potential non-random association structure between  
138 pN/pS rates of different orthologs. To this end, we used a different setting of the LMM, now  
139 including both the environmental covariates and pN/pS rates of all other orthologs. Even after  
140 accounting for potential non-random association structure between pN/pS rates of different  
141 orthologs due to clonal reproduction, the environmental effect was still significantly bigger than  
142 zero ( $P < 0.05$ ). In particular, there is an overlap of over 40% in orthologs that are top ranked in  
143 terms of EEV between these two model settings. Overall, we observed a very strong association  
144 between environmental measurements and the magnitude of purifying selection exerted on most  
145 orthologous gene groups. We also observed an association with environmental parameters  
146 across many functional categories, including 'housekeeping' genes that are important for survival  
147 in any given niche, and wished to further elucidate potential mechanisms that can explain it.

148

#### 149 **Environment-associated selection is stronger in resource-consuming genes**

150 Previous studies<sup>4,7</sup> suggested that random mutations that lead to incorporation of additional  
151 nutrients to the protein sequences of microbes result in a selective disadvantage. This implies  
152 that genes whose protein sequences consume more resources would be under stronger  
153 selection. Specifically, highly expressed genes would consume more resources and will therefore

154 be under stronger purifying selection<sup>7,8,15</sup>. In these genes, a mutation leading to incorporation of  
155 additional resources would be magnified, as one highly transcribed DNA sequence could translate  
156 to thousands of proteins, each consuming more resources. To quantitatively corroborate this  
157 hypothesis and examine whether these underlying forces are reflected in the above associations  
158 with pN/pS rates, we used an additional expression dataset for marine microbial genes<sup>16</sup> to rank  
159 KEGG orthologs by their mean expression (Methods). We found that the most highly expressed  
160 genes had a significantly higher fraction of the variance in their pN/pS explained by the  
161 environment, as compared to the least expressed ones (Fig. 2C; Mann-Whitney *U* test  $P < 10^{-9}$ ).  
162 We found a significant difference between the gradient of pN/pS rates, as a function of depth  
163 (highly correlated with nitrate, nitrite and oxygen; Fig S1I), in highly expressed genes, as  
164 compared to least expressed ones (Fig. S4A; Mann-Whitney *U* test  $P < 10^{-5}$ ), where the former  
165 increased more sharply with depth. A few notable examples for genes with high expression and  
166 environmental explained variance, as compared to other KEGG KOs, are the  $\beta$  subunit of RNA  
167 polymerase (K03043; EEV = 0.82, 0.33 in the first and second LMM settings, respectively; ranked  
168 first in both model settings), the  $\beta'$  subunit (K03046; EEV = 0.8, 0.28; ranked in the top five in  
169 both settings) and a peptide/nickel transporter involved in quorum sensing (K02035; EEV = 0.81,  
170 0.33; ranked second in both settings).



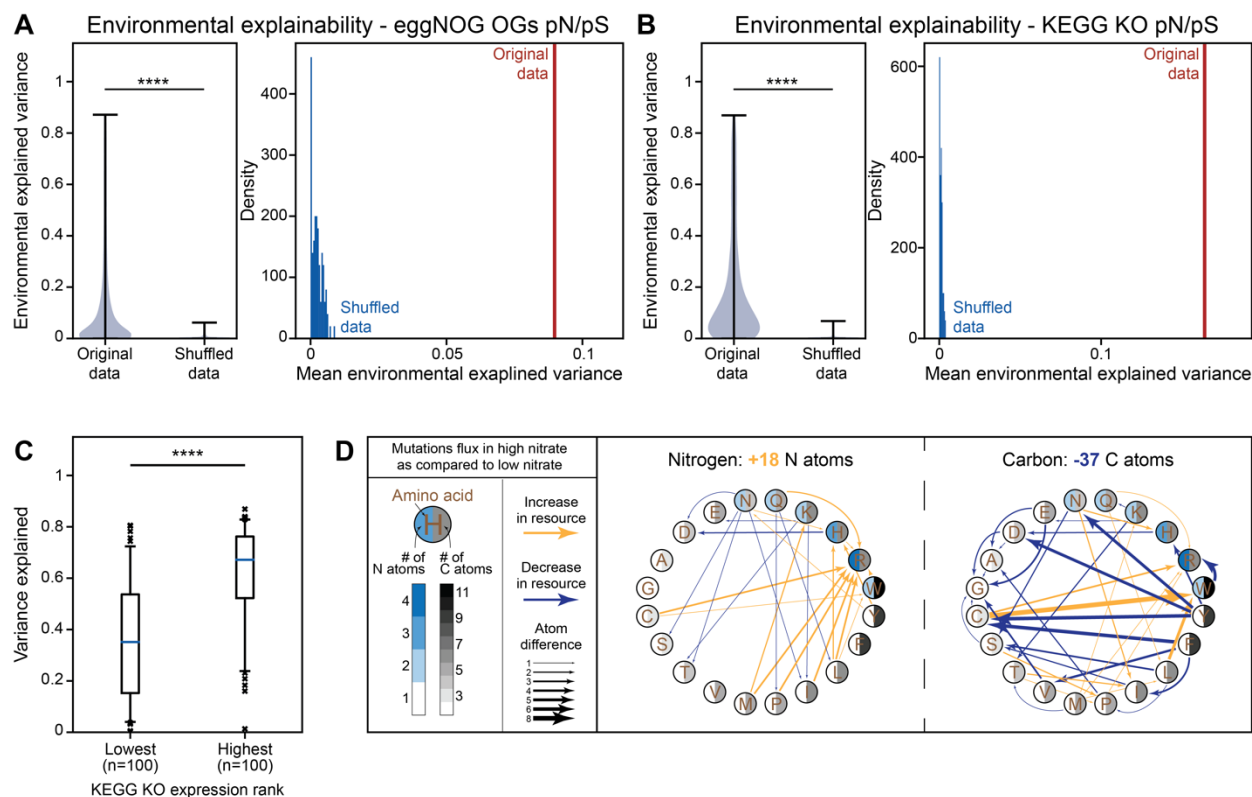

171

172 **Figure 2. Analysis of pN/pS rates reveals strong resource-driven selection.** (A) Left, violin plot of  
 173 the variance of eggNOG OG pN/pS rates that was explained by the environment as compared to the  
 174 same data with shuffled labels; Right, mean nitrate variance explained in unshuffled data (red) as compared  
 175 to a histogram (blue) of mean variance explained in 100 executions with shuffled data. (B) Same as  
 176 A, for KEGG KO pN/pS. (C) Box plots (line, median; box, IQR; whiskers, 5th and 95th percentiles) of  
 177 variance in pN/pS explained by the environment in the 100 lowest and highest expressed KEGG KOs.  
 178 (D) Depiction of mutation flux (Methods) common in high versus low environmental nitrate  
 179 concentrations, affecting amino acid nitrogen (left) and carbon (right) content. Yellow arrows, increase  
 180 in resource; blue arrows, decrease in resource; arrow thickness corresponds to number of atoms  
 181 changed by mutation. \*\*\*\*, Mann-Whitney  $U$   $p < 10^{-9}$ .

182

183 We additionally hypothesized that genes coding for extracellular proteins will have a similar  
 184 pattern as in this case, the resources excreted from the cell cannot be recycled. We found the  
 185 same pattern of significantly higher EEV in extracellular protein-coding genes as compared to  
 186 other gene groups (Methods; Fig. S4B;  $P < 0.05$ ). Overall, our results indicate that these genes  
 187 exhibit higher 'resource sensitivity', manifested by higher variance explained by the environment,

188 potentially due to their high expression levels. This finding provides a data-driven evolutionary  
189 perspective to theory and experiments showing lower resource incorporation in highly expressed  
190 genes<sup>7,8</sup>. In summary, the variation in resource-consuming genes, (i.e., highly expressed and  
191 extracellular protein-coding), further strengthens our results regarding the breadth of resource-  
192 driven selection.

193

#### 194 **Resource-driven selection exerts a strong effect on protein-coding sequences**

195 We next sought to quantify the effects of this resource-driven selection on protein-coding  
196 sequences. To this end, we compared the codon mutation frequencies in low- and high-nitrate  
197 samples, after accounting for simplex-related confounders (Methods), and found significant  
198 differences in codon mutation frequencies (Fig. S5A-C). We sought to examine the typical change  
199 in nutrient consumption in varying nitrate concentrations. We thus defined mutation flux, as the  
200 ratio between a codon mutation and its reverse, and estimated it using the log-odds ratio between  
201 the two (e.g.,  $\log(p(AAA \rightarrow AAC)/p(AAC \rightarrow AAA))$ ). Notably, across all the mutations significantly  
202 more prevalent in samples from high nitrate environments (Methods), averaged across amino  
203 acids, we find a significant total increase in nitrogen (Fig. 2D; 18 N atoms summed across all  
204 significant amino acid changes,  $P=0.0082$ ), decrease in carbon (Fig 2D; -37 atoms,  $P=0.0165$ ),  
205 decrease in sulfur (-6 atoms,  $P=0.009$ ), a significant decrease in molecular weight (-508.91 g/mol,  
206  $P=0.0193$ ) and a non-significant decrease in oxygen (-6 atoms,  $P=0.1505$ ). These results indicate  
207 that the lower the nitrate concentrations are, the stronger the selection against mutations leading  
208 to higher nitrogen incorporation in protein sequences.

209 While nitrate concentrations increase with depth (Fig. S11), dissolved organic carbon  
210 concentrations typically decrease<sup>6</sup>. Our results are supported by previous observations regarding  
211 genomic and proteomic changes associated with environmental concentrations of nitrate<sup>4</sup>.  
212 Mutations in nitrate rich and, typically, carbon poor environments were shown to drive an increase

213 in genomic GC content, accompanied by higher rates of nitrogen incorporation and lower rates of  
214 carbon incorporation into protein sequences. Here we show, in high resolution, the typical  
215 mutations that underlie this phenomenon (Fig. 2D; Fig. S5D). As we base our analysis on pN/pS  
216 rates, a proxy for the magnitude and direction of selection exerted on coding sequences, we  
217 suggest that the differences observed in gene GC content across varying nitrate concentrations  
218 are inseparable from changes to the proteome, and are possibly the result of resource-driven  
219 selection exerted on these coding sequences.

220

### 221 **Resource-conservation as an optimization mechanism in the genetic code**

222 The standard genetic code is known to be highly efficient in minimizing the effects of  
223 mistranslation errors and point mutations<sup>17–20</sup>. This optimality is prominent among theories  
224 regarding the origin of the genetic code<sup>21–24</sup>. According to the theory of error minimization,  
225 selection to minimize the adverse effect of point mutations and translation errors was the principal  
226 factor governing the evolution of the genetic code<sup>25–32</sup>. As a quantitative exploration of this theory  
227 requires a well-defined cost function, a few measures of amino acid fitness were previously  
228 suggested (e.g., PR scale, Hydrophathy index) based on stereochemical theories and hydrophathy  
229 properties<sup>33–36</sup>. As we have observed strong patterns of selection for specific amino acids in  
230 nutrient-limited environments, we hypothesized that resource conservation may also be a factor  
231 in code error minimization.

232 Specifically, we hypothesized that the strong resource-driven selection, whose signature is visible  
233 on protein-coding sequences across marine functional groups, may also have resulted in a  
234 resource-optimized genetic code, such that the expected cost of a random mutation, in terms of  
235 added resources, is minimized. To rigorously test this hypothesis, we first defined a cost function  
236 for each element  $e$  (e.g., carbon, nitrogen), such that the ‘tariff’ of a single mutation is the  
237 difference in the number of atoms before and after the mutation. As an example, a missense

238 mutation from codon CCA to codon CGA results in an amino acid change from proline to arginine,  
239 and an increase of 3 nitrogen atoms and one carbon atom, setting the nitrogen cost of such  
240 mutation to 3 and the carbon cost to 1 (Fig. 3A).

241 To estimate the cost of a random mutation on each element, across the entire genetic code, we  
242 calculated, for nitrogen, carbon and oxygen, the Expected Random Mutation Cost (ERMC) for the  
243 standard genetic code  $V_S$ :

$$244 \quad ERMC_e(V_S) = \sum_{v, v' \in V_S} P(v)P(\text{mut}(v, v'))c_e^+(v, v')$$

245 Where  $P(v)$  is the abundance of codon  $v$ , calculated from all marine samples;  $P(\text{mut}(v, v'))$  is the  
246 probability of mutation from codon  $v$  to codon  $v'$ , set to be the relative abundance of the single  
247 nucleotide mutation driving this codon change (e.g. for mutation from GCA to CCA, we use the  
248 abundance of G-to-C transversions), calculated from all mutations observed in fourfold  
249 degenerate codons to avoid sites under strong selection; and  $c_e^+(v, v')$  is the ‘tariff’ of a single  
250 mutation if an atom of element  $e$  has been added to the post-mutation amino acid (Methods). For  
251 the standard genetic code, and typical codon abundances and mutation rates calculated from  
252 marine microbes, we report an ERMC of 0.440, 0.158 and 0.163 for carbon, nitrogen and oxygen  
253 respectively, corresponding to an average increase of this number of atoms per random mutation.

254 To check if the genetic code, along with codon abundances and mutation rates in marine  
255 microbes, is indeed robust to resource-consuming mutations, we compared it to other hypothetical  
256 codes. To this end, we simulated alternative genetic codes by randomizing the first and second  
257 position in all codons, while constraining the permutation in stop codons (Methods), creating a  
258 null distribution of ERMC. We found that the standard genetic code, common to most life forms,  
259 is parsimonious in terms of carbon and nitrogen utilization, given a random mutation, manifested  
260 by minimization of the ERMC for nitrogen (Fig 3B;  $ERMC_N P=0.0153$ ) and carbon (Fig. 3B;  $ERMC_C$

261 P=0.0109), while in the ERM for oxygen we did not find a significant trend (Fig. 3B; P=0.8659).  
262 Remarkably, only two out of 10,000 randomized genetic codes were more resource-robust than  
263 the standard genetic code in conservation of nitrogen and carbon together (P=0.0002).  
264 Nonetheless, these alternative codes are less conservative than the standard code in maintaining  
265 hydrophobicity and hydrophilicity of amino acids given a random mutation (Methods; Fig. S6).  
266 They may therefore lead to proteins that are more susceptible to structural changes in the event  
267 of a random mutation, as was postulated previously in theories governing the evolution of the  
268 genetic code.

269 Finally, we sought to confirm that our elemental cost function is not confounded by traditional  
270 properties of amino acids such as the polar requirement (PR) and hydropathy index<sup>33-36</sup>. To this  
271 end, we calculated the ERM for using these common cost functions for the standard genetic code  
272 and for simulated alternative ones, and compared the overlap between traditional cost functions  
273 and our elemental cost functions (Methods). For both cost functions, we found that optimality in  
274 terms of carbon or nitrogen utilization implies lack of optimality in polar requirement or in  
275 hydropathy (Table S1 nitrogen-PR,  $P < 10^{-16}$ ; nitrogen-hydropathy,  $P < 10^{-4}$ ; carbon-PR,  $P < 10^{-7}$ ;  
276 carbon-hydropathy,  $P < 10^{-20}$ ). This result indicates that carbon and nitrogen conservation in the  
277 genetic code is not confounded by previously reported optimization properties such as hydropathy  
278 and PR. Altogether, these results indicate resource optimization in marine microbes is driven by  
279 the structure of the genetic code, alongside specific amino acid choices.

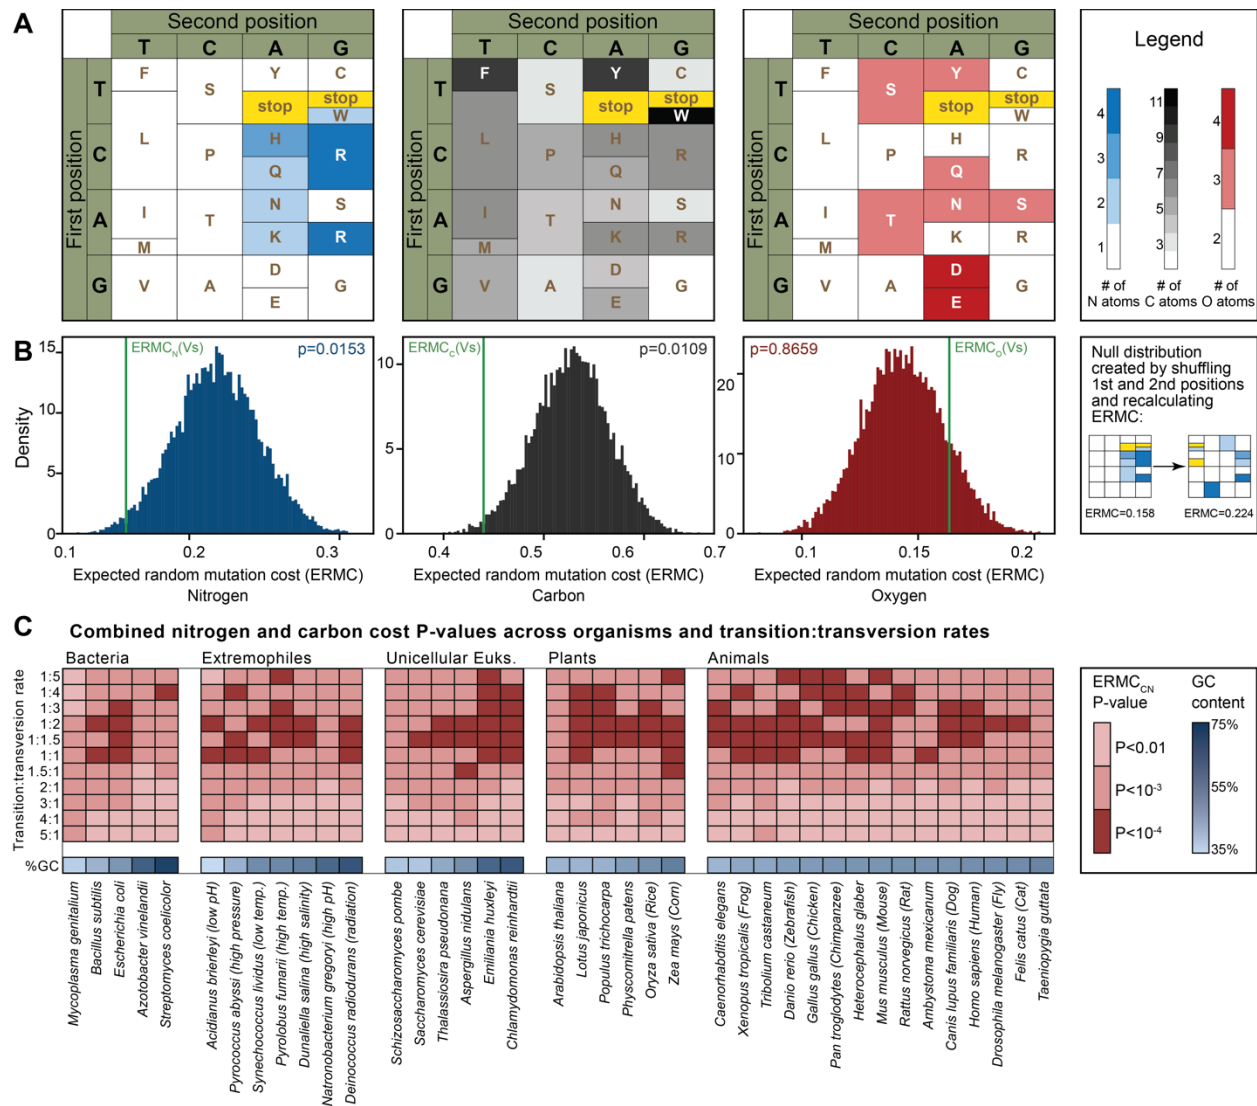

280

281 **Figure 3. Resource-conservation is facilitated by the genetic code.** (A) Nitrogen  
 282 (center) and oxygen (right) content of different amino acids depicted along their positions in the  
 283 standard genetic code. (B) Histograms of the expected random mutation cost (ERMC), in 10,000  
 284 random permutations of the genetic code for nitrogen (left, blue), carbon (center, black) and oxygen  
 285 (right, red). Green bar marks the ERMC of the standard genetic code, ERMC(Vs), for each of the  
 286 elements. (C) Heat map of ERMC<sub>CN</sub> P-values across 39 organisms and 11 transition:transversion  
 287 rates. Organisms in each of the groups are ordered according to the GC content of their coding  
 288 sequences.

## 289 **The genetic code facilitates resource conservation across kingdoms**

290 To show that the robustness of the genetic code in terms of resource-consumption was not limited  
291 to our dataset and analytic approach, we calculated the ERMIC of 187 species of genera  
292 *Prochlorococcus* and *Synechococcus*. We calculated codon abundances and mutation rates  
293 using prior knowledge of both protein-coding sequences<sup>5</sup> and the published  
294 transition:transversion rate of 2:1<sup>37</sup> (Methods). By testing the ERMIC of the standard genetic code  
295 against a null distribution generated, as before, given these known parameters rather than ones  
296 inferred from marine samples, we were able to reveal significant conservation of carbon, nitrogen,  
297 and both elements combined (Fig. S7A; ERMIC<sub>C</sub> mean P=0.013, P=0.020; ERMIC<sub>N</sub> mean  
298 P=0.049, P=0.032; ERMIC<sub>CN</sub> P=0.0004, P=0.0007 for *Prochlorococcus* and *Synechococcus*,  
299 respectively). To account for inaccuracies and variation in the known parameters, we next  
300 calculated the ERMIC null distribution for a wide range of transition:transversion rates. We show  
301 that the ERMIC of the standard genetic code remains significantly conserved for nitrogen, carbon,  
302 and both elements combined for most physiological transition:transversion rates (Fig. S7B),  
303 indicating that the structure of the genetic code and codon abundances of organisms are the  
304 driving force behind genetic code optimization.

305 To explore whether this optimality in the genetic code in terms of nutrient conservation extends  
306 across different lifeforms, we performed a similar calculation using codon abundances from 39  
307 organisms across all domains of life, including all human protein-coding sequences, and tested a  
308 range of transition:transversion rates (Methods). We find that, similarly to marine microbes, the  
309 genetic code features optimization in terms of resource utilization for all tested organisms,  
310 manifested by a significant minimization of the combined ERMIC of nitrogen and carbon in all  
311 transition:transversion rates tested (P<0.01, Fig. 3C). Moreover, we find significant optimization,  
312 albeit of a lower magnitude, even in the theoretical case where all codon abundances are the  
313 same (Fig. S7C). The codon abundances of a great majority of organisms also demonstrate

314 significant minimization of ERM C in nitrogen (Fig. S7D) and carbon (Fig. S7E), given a random  
315 mutation, for a wide range of transition:transversion rates. These results indicate that resource  
316 optimization in the genetic code transcends taxonomy, codon choices, and mutation rates. It  
317 shows that the genetic code may have structural properties that make it robust in terms of  
318 resource-consumption. It is also possible that amino acid and codon usage in organisms has  
319 evolved to lower nutrient consumption in case of a random mutation, informed by the structure of  
320 the code.

321

### 322 **Structural principles drive optimization in the genetic code**

323 We next wished to examine the organizing principles that drive the strong resource optimization  
324 evident in the standard genetic code. We observed that codons of the nitrogen-rich amino acids  
325 histidine, glutamine, asparagine, lysine and arginine span only two nucleotides in their first  
326 position and two in their second position. We define this organization to be a ‘square’ arrangement  
327 (Fig. 4A; Methods), and hypothesize that, as compared with other arrangements, it amplifies  
328 nitrogen conservation. Specifically, in the square arrangement, codons coding for some amino  
329 acids (alanine, valine, phenylalanine, and several leucine and serine codons) require at least two  
330 mutations to increase the number of nitrogen atoms in the resulting amino acid. This is in contrast  
331 to other hypothetical arrangements, including a ‘diagonal’ arrangement in which nitrogen-rich  
332 amino acid codons span all possible nucleotides in the first and second positions (Fig 4A;  
333 Methods). We suggest that the diagonal arrangement would be nutrient-wasteful, as in these  
334 arrangements a single mutation could increase the nitrogen content of a protein sequence in more  
335 than one way. To rigorously test this hypothesis, we generated 10,000 random genetic codes,  
336 with 220 arrangements happening to embody a square structure, and 127 a diagonal one. We  
337 found that, when compared to all other possible arrangements, square arrangements present a  
338 significantly lower ERM C (Fig 4A; Mann-Whitney  $U$   $P < 10^{-10}$ ) while diagonal arrangements exhibit



339 a significantly higher ERMC (Fig. 4A; Mann-Whitney  $U$   $P < 10^{-10}$ ). This result demonstrates that  
 340 resource optimization in the genetic code is driven by structural principles, perhaps underlying  
 341 the significant optimization observed across kingdoms.

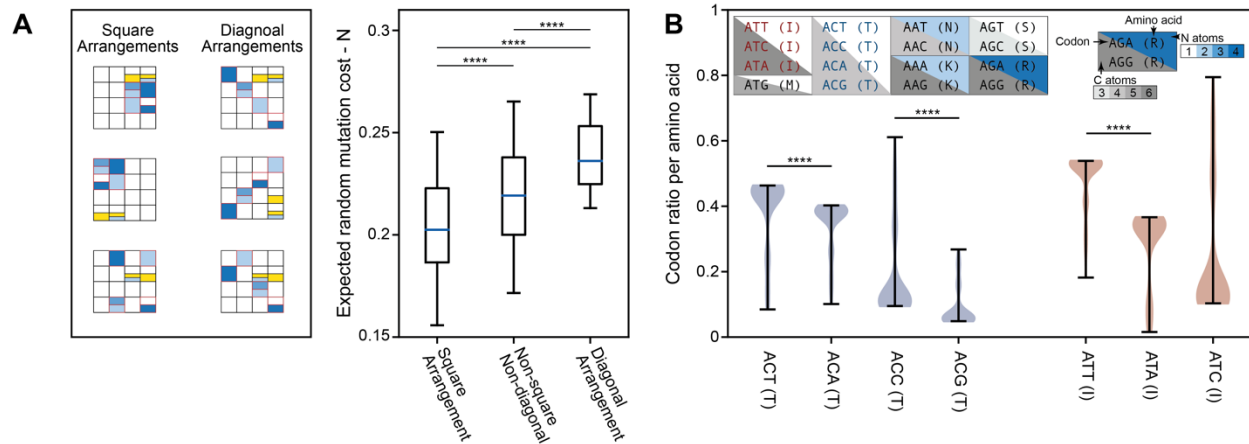

342

343 **Figure 4. Structural properties and codon usage bias underlying optimality in the genetic code.**

344 (A) Box plots (line, median; box, IQR; whiskers, 5th and 95th percentiles) of ERMC<sub>N</sub> of square  
 345 arrangements (left) and diagonal arrangements (right, Methods), as compared to all other  
 346 arrangements (center) out of 10,000 randomized arrangements of the code. (B) Violin plot of codon  
 347 usage among 187 species of *Prochlorococcus* and *Synechococcus* showing significant preference of  
 348 threonine codons ACT and ACC as compared to ACA and ACG, and of isoleucine codon ATT as  
 349 compared to ACA. \*\*\*\*,  $P < 10^{-10}$ .

350

351 Finally, we hypothesized that codon usage for a single amino acid may also be biased due to  
 352 differential cost of a random mutation for each codon. We therefore examined all amino acids  
 353 coded by codons with adenine in their first position, focusing on codon usage of the amino acid  
 354 threonine. We note that a C-to-G transversion in the second position for codons ACT and ACC  
 355 yields serine (AGT and AGC, respectively), and that the same mutation for codons ACA and ACG  
 356 yields arginine (AGA and AGG, respectively; Fig. 4B, inset). As arginine has higher carbon and  
 357 nitrogen content than serine, and lysine a higher carbon content than asparagine, we  
 358 hypothesized that following a nutrient-conservative model, codons ACT and ACC will have a  
 359 higher abundance than codons ACA and ACG, respectively, given a known genomic GC content.

360 We thus examined codon usage in 187 *Prochlorococcus* and *Synechococcus* strains, and show  
361 a significantly higher use of ACT as compared to ACA (Fig 4B; Wilcoxon signed-rank test  $P < 10^{-20}$ )  
362 and ACC as compared to ACG (Fig 4B; Wilcoxon signed-rank test  $P < 10^{-20}$ ). Similarly,  
363 Isoleucine codon ATT has higher abundance as compared to ATA (Fig 4B; Wilcoxon signed-rank  
364 test  $P < 10^{-20}$ ). These results demonstrate that resource conservation is a central driving force in  
365 selection processes guiding codon usage and may affect not only protein sequence but also  
366 cellular translation efficiency.

367

## 368 **Discussion**

369 In this work, we use the proxy of pN/pS rates to show strong purifying selection acting upon  
370 protein-coding genes in the marine environment. We demonstrate that a substantial fraction of  
371 the variance in pN/pS rates could be attributed to environmental factors, and highlight a strong  
372 association of these rates with nitrate concentrations. We show that the variance in pN/pS rates,  
373 across resource-consuming genes (i.e., highly expressed and extracellular protein-coding), can  
374 be attributed to environmental factors, suggesting that stronger resource-driven selection is  
375 exerted upon them. Using single nucleotide polymorphisms from across marine samples, we  
376 characterize the typical mutations in nitrate-rich versus nitrate-poor environments and show that  
377 these drive incorporation of additional nitrogen-rich amino acids and fewer carbon-rich amino  
378 acids to protein sequences. Finally, we provide evidence that the standard genetic code, shared  
379 among most lifeforms, facilitates resource conservation, demonstrating that along with codon  
380 choices, it is conservative in incorporating additional atoms of nitrogen and carbon given a random  
381 mutation. Notably, we show, across tens of thousands of simulated genetic codes, that the  
382 standard genetic code surpasses almost all other random simulated codes in conservation of  
383 nitrogen and carbon, across multiple taxa from all domains of Life and across multiple codon  
384 choices and mutation rates.

385 Hypotheses regarding the origin of the genetic code include stereochemical affinity between a  
386 codon or anticodon and their amino acid<sup>38,39</sup>; a frozen accident theory<sup>24</sup>, relying on the fact that  
387 the code is highly immutable; a co-evolution of the genetic code with the emergence of amino  
388 acid-producing biosynthetic pathways<sup>22</sup>; and an early fixation of an optimal genetic code,  
389 suggesting that the code evolved under selection for error minimization<sup>40</sup>. Our observations are  
390 in line with the latter theory of optimality, and suggest that the genetic code may have been  
391 optimized also for nutrient conservation. While we do not know the nature of nutrient cycling in  
392 the primordial ocean, we hypothesize that scarcity of nitrogen and carbon that are common now  
393 may have also prevailed alongside early lifeforms. Thus, an organism harboring a nitrogen- and  
394 carbon-efficient genetic code would have had a selective advantage over its peers, especially in  
395 the absence of fully evolved DNA mutation repair mechanisms.

396 We note that while we observe resource optimization for nitrogen and carbon conservation in the  
397 standard genetic code, oxygen conservation is not optimized. We offer several hypotheses  
398 regarding this lack of optimization. First, it is possible that since oxygen is highly abundant in  
399 organic molecules, it is less of a limiting factor as compared to carbon and nitrogen and therefore  
400 its optimization does not confer a selective advantage. Another option is that oxygen-rich amino  
401 acids may function in cellular processes that are independent of protein synthesis and are  
402 therefore more readily available and thus not optimized. Prominent examples for this hypothesis  
403 are aspartate, which also performs an important function in the malate-aspartate shunt, and  
404 glutamate, which plays a role in countless cellular processes.

405 Overall, by using publicly available data on ocean microbes and their corresponding  
406 environmental measures, we were able to discern strong purifying selective pressure which  
407 shapes marine microbial life, and may have even shaped the structure of the genetic code that  
408 was since preserved for billions of years. With the advent of new multi-omic data from

409 environmental studies, we will be able to better divulge the intricate relationships of microbes with  
410 a rapidly changing global environment.

## 411 **Methods**

412

### 413 **Marine microbiome samples**

414 Marine samples collected with Tara oceans<sup>3</sup>, bioGEO TRACES<sup>10</sup>, the Hawaii Ocean Timeseries  
415 (HOT) and the Bermuda Atlantic Timeseries Series (BATS)<sup>10</sup> were downloaded from ENA with  
416 accessions ENA:PRJEB1787 (TARA oceans prokaryotic fraction), ENA:PRJNA385854  
417 (bioGEO TRACES) and ENA:PRJNA385855 (HOT/BATS), each sample with a minimum of 5  
418 million reads.

419

### 420 **Mapping of Illumina reads to reference gene sequences**

421 Samples were mapped to nucleotide sequences from the Ocean Microbiome Reference Gene  
422 Catalog (OM-RGC)<sup>3</sup> using bowtie2 with parameters --sensitive -a 20 --quiet -p 8 and saved as a  
423 bam file using the 'samtools view' command. As gene sequences are relatively short, reads from  
424 both ends of the metagenomic sequencing samples were mapped separately, and reunited prior  
425 to variant calling.

426

### 427 **Determining metagenomic read assignment probability**

428 We determined the probability of assignment of metagenomic reads to marine microbial genes  
429 using the Iterative Coverage-based Read-assignment Algorithm (ICRA)<sup>43</sup> with parameters  
430 max\_mismatch=12, consider\_lengths=True, epsilon=1e-6, max\_iterations=30, min\_bins=4,  
431 max\_bins=100, min\_reads=10, dense\_region\_coverage=60, length\_minimum=300,  
432 length\_maximum=2e5, use\_theta=False. To prevent spurious mapping, alignments were  
433 considered for downstream analysis only if the probability of alignment was higher than 0.9.

## 434 **Variant calling**

435 Alignments from both ends of all sequencing runs pertaining to the same sample were united  
436 using the samtools cat command and sorted using the samtools sort command, with default  
437 parameters.

438 To facilitate variant calling in tractable timescales, each filtered, untied and sorted .bam file was  
439 split into chunks, each encompassing 10,000 reference sequences (out of about 40 million  
440 reference sequences). For each such batch of reference sequences, we called variants across  
441 all samples using the following command: `bcftools mpileup --threads 4 -a FORMAT/AD -Q 15 -L`  
442 `1000 -d 100000 -m 2 -f <OM-RGC fasta> <bam filenames> | bcftools call --threads 4 -Ov -mv -o`  
443 `<output vcf>`, where `<OM-RGC fasta>` is the fasta file of OM-RGC nucleotide sequences, `<bam`  
444 `filenames>` are the filenames of all .bam files pertaining to the reference sequence chunk in  
445 question, and `<output vcf>` is the output .vcf file pertaining to that same chunk.

446 Single nucleotide variants were considered as SNPs if they had an allele frequency if at least 1%  
447 <sup>44</sup>, were supported by at least 4 reads across samples, and had a GATK quality score of at least  
448 30.

449 For a sample mapped to a reference gene to be considered for downstream analysis, we  
450 demanded that at least 60% of SNPs called along the length of the reference gene for that sample  
451 would be supported by at least 4 reads, thereby enabling accurate calculation of pN/pS rates. For  
452 a gene to be considered for downstream analysis, we demanded for that gene to have at least  
453 one SNP common to 20 or more samples.

454

## 455 **Calculation of pN/pS in single genes**

456 While comparing SNP patterns across samples, it is instrumental to avoid biases due to  
457 differences in coverage. We therefore downsampled the read coverage depth to the minimum

458 depth across all samples, for each position in a sample that was supported by more than 4 reads.  
459 For positions that had minimum support of fewer than 4 reads, no subsampling was performed.  
460 Subsampling was performed by drawing from a multinomial distribution, with  $n$  trials and variant  
461 probabilities  $p$ , where  $n$  was set to the calculated minimum depth and  $p$  set to the relative  
462 abundance of each variant in the given sample.

463 The expected ratio of non-synonymous and synonymous substitutions was calculated by  
464 considering all called SNPs in every gene. First, we calculate a consensus sequence for each  
465 gene by taking, for each SNP position, the variant that was overall more common across all  
466 samples (after the subsampling performed above). We counted, for each gene, the number of  
467 non-synonymous and synonymous sites across the consensus sequence. For each SNP position  
468 in each sample, we counted the number of synonymous and nonsynonymous substitutions. As  
469 more than one variant can exist in a single sample, we considered the relative abundance of  
470 synonymous to nonsynonymous substitutions dictated by the different variants. For example, if  
471 the reference codon was CAC, coding for histidine, one variant, a C-to-G transversion in the third  
472 position abundant at 50%, led to a nonsynonymous mutation that resulted in glutamine (CAG)  
473 while another variant in the same sample and the same position was a synonymous C-to-T  
474 transition, we counted 0.5 synonymous substitutions and 0.5 nonsynonymous substitutions. We  
475 followed by calculating the pN/pS ratio:

$$476 \quad pN/pS = \frac{\textit{nonsynonymous substitutions}}{\textit{nonsynonymous sites}} / \frac{\textit{synonymous substitutions}}{\textit{synonymous sites}}$$

477 pN/pS characterizes selective constraints at the population level, as opposed to dN/dS that  
478 characterizes it between individual species<sup>12</sup> and can thus be standardized to a specific time  
479 interval and used as an absolute metric. Nonetheless, dN/dS ratios are not applicable in our  
480 study since polymorphic sites derived from short read sequencing impede having haplotypes  
481 which are a prerequisite for calculating dN/dS.

482

### 483 **Aggregation of calculated metrics using KEGG and eggNOG orthologies**

484 Functional assignments to KEGG KOs and eggNOG OGs for all OM-RGC genes were computed  
485 using eggNOG-mapper v2 based on the eggNOG v5.0 database<sup>41,45</sup>. For each functional  
486 assignment in each sample, all OM-RGC genes assigned with the same functional assignment  
487 were concatenated and treated as one long genomic sequence per the calculation of pN/pS ratios.  
488 To reduce noise in pN/pS calculation, we considered only KOs and OGs that had at least 5 genes  
489 per sample, in at least 50 samples.

490

### 491 **Environmental variables**

492 For each sample, we compiled measurements pertaining to the following environmental  
493 measurements: Depth [m], Nitrate [ $\mu\text{mol/kg}$ ], Nitrite [ $\mu\text{mol/kg}$ ], Oxygen [ $\mu\text{mol/kg}$ ], Phosphate  
494 [ $\mu\text{mol/kg}$ ], Silicate [ $\mu\text{mol/kg}$ ], Temperature [C] and Salinity.

495 Tara oceans metadata was downloaded from PANGAEA (<https://doi.pangaea.de/10.1594/>) with  
496 accession numbers PANGAEA.875575 (Nutrients) and PANGAEA.875576 (Watercolumn  
497 sensor), and recorded median values for all the above nutrients were extracted. Tara nutrient  
498 concentrations were given as [ $\mu\text{mol/l}$ ]. Conversion to [ $\mu\text{mol/kg}$ ] was done by dividing the  
499 measured concentration by the measured specific gravity for the same sample.

500 bioGEOTRACES metadata was compiled from CTD sensor data and discrete sample data from  
501 the GEOTRACES intermediate data product v.2<sup>46</sup>. HOT metadata was downloaded from the ftp  
502 server of the University of Hawai'i at Manoa (<ftp://ftp.soest.hawaii.edu/hot/>) and BATS metadata  
503 was downloaded from the Bermuda Institute of Ocean Sciences (<http://bats.bios.edu/bats-data/>).  
504 As GEOTRACES/HOT/BATS ocean water samples are not linked to specific biological samples  
505 as is the case with Tara oceans samples, we considered only water samples from the exact same



506 geographic location, within a day from biological sample collection time, and within 5% difference  
507 in depth of collection, and chose the closest sample in terms of time and depth of collection. As  
508 all these measurements of environmental conditions are highly correlated with each other (Fig.  
509 S1I), we utilized this correlation structure to impute missing values using the EM algorithm<sup>47</sup>.

510

## 511 **Linear mixed models**

512 **Generative model** Consider a collection of  $M_i$ , where  $i \in \{1,2\}$  features (i.e.,  $M_{1,2}$  number of KEGG  
513 and eggNOG orthologs respectively), each measured across  $K$  samples. We get as input an  
514  $(M_i \times K)$  matrix  $O^i$ , where  $O_{kj}^i$  is the pN/pS of ortholog  $j$  in sample  $k$ . Let  $y_m^i = (O_{m1}^i, \dots, O_{mK}^i)$   
515 be a  $K \times 1$  vector representing the pN/pS in ortholog  $m$ , according to grouping  $i$ , across  $K$  samples  
516 (e.g., pN/pS in KEGG KO K02274 across  $K$  samples). Let  $W$  be a  $(K \times q)$  normalized matrix of  
517 environmental measurements. This included the depth of the sample, water temperature and  
518 salinity, as well as concentration of the key molecules nitrate, nitrite, oxygen, phosphate and  
519 silicate.

520 With these notations, we assume the following generative linear model

$$521 \quad y_m^i = Wu_m + \epsilon_m \quad (1)$$

522

523 Where  $u_m$  and  $\epsilon_m$  are independent random variables distributed as  $u_m \sim N(0, \sigma_{u_m}^2 I)$  and  $\epsilon_m \sim$   
524  $N(0, \sigma_{\epsilon_m}^2 I)$ . The parameters of the model are  $\sigma_{u_m}^2$  and  $\sigma_{\epsilon_m}^2$ .

525 It is easy to verify that an equivalent mathematical representation of model (1) is given by

526

$$527 \quad y_m^i \sim N(0, \sigma_K^2 K + \sigma_{\epsilon_m}^2 I) \quad (2)$$

528 where  $\sigma_K^2 = M^i \sigma^2_{u_m}$ ,  $K = \frac{1}{M^i} WW^T$ . We will refer to  $K$  as the environmental kinship matrix, which  
529 represents the similarity, in terms of environmental covariates, between every pair of samples  
530 across grouping  $i$  (i.e., represent the correlation structure to the data).

531

532 **Environmental explained variance:** The explained variance of a specific feature  $y^i_m$  by the  
533 environmental measurements

534 
$$\chi^i_m = \frac{\sigma_K^2}{\sigma_K^2 + \sigma_{\epsilon_m}^2} \quad (3)$$

535 In the second model setting, we wished to account for a potential non-random association  
536 structure between pN/pS rates of different orthologs. To this end, we included both the  
537 environmental covariates and pN/pS rates of all orthologs not inferred as two different sets of  
538 variance components.

539 In this setting, Let  $W_1$  be an  $(K \times q)$  normalized matrix of environmental measurements, as before  
540 and  $W_2$  be an  $(K \times M_i - 1)$  normalized matrix of pN/pS measurements according to grouping  $i$   
541 (i.e., KEGG or eggNOG orthologs) across  $K$  samples, where for each  $y^i_m$  we exclude the pN/pS  
542 rates of the focal ortholog  $m$ .

543 With these notations, we assume the following model

544 
$$y^i_m = W_1 u_{1m} + W_2 u_{2m} + \epsilon_m \quad (4)$$

545 It is easy to verify that an equivalent mathematical representation of model (1) is given by

546 
$$y^i_m \sim N(0, \sigma_{K_1}^2 K_1 + \sigma_{K_2}^2 K_2 + \sigma_{\epsilon_m}^2 I) \quad (5)$$

547 where  $\sigma_{K_1}^2 = M^i \sigma^2_{u_{1m}}$ ,  $\sigma_{K_2}^2 = M^i \sigma^2_{u_{2m}}$ ,  $K_1 = \frac{1}{M^i} W_1 W_1^T$ ,  $K_2 = \frac{1}{M^i} W_2 W_2^T$ .  $K_1$  and  $K_2$  represent  
548 the similarity, in terms of environmental covariates and pN/pS rates, between every pair of  
549 samples across grouping  $i$  (i.e., represent the correlation structure to the data).

550 In this setting, the environmental explained variance is:

551 
$$\chi^2_m = \frac{\sigma^2_{K_1} + \sigma^2_{K_2}}{\sigma^2_{K_1} + \sigma^2_{K_2} + \sigma^2_{\epsilon_m}} \quad (6)$$

552

### 553 **KEGG KO expression data as a ranking metric**

554 Using expression data from 4,092 KEGG KOs collected by Kolody et al. <sup>16</sup>, we ranked the KO  
555 genes in our marine samples in the following way. We first represent the expression data in  
556 relative abundance space (normalize each sample by its read counts). Next, for each KO  $i$ , where  
557  $i \in \{1, \dots, I\}$ , we sum across different instances of this focal KO. The input is an  $m \times n$  matrix,  
558 where  $m$  is the number of different instances of focal KO  $i$ , and  $n$  is the number of samples. The  
559 output is a vector of length  $n$ :  $(x_1, \dots, x_n)$ . Finally, we average the expression levels  
560  $(x_1, \dots, x_n)$  across samples:  $\frac{1}{n} \sum_{j=1}^n x_j$  and rank the KOs based on the calculated average  
561 expression. Notably, we limited the scope of our analysis to samples collected only in small  
562 fraction filters (0.22  $\mu m$ ).

563

### 564 **Determination of *Synechococcus*-specific pN/pS rates**

565 We identified genes from the OM-RGC database belonging exclusively to genus *Synechococcus*  
566 using eggNOG-mapper. We filtered out genes that were present in fewer than 20% of all samples.  
567 For each of the samples, we calculated pN/pS on all gene sequences combined. We further  
568 divided the samples into five identically sized groups, based on environmental nitrate  
569 concentrations, and for each group filtered out genes that were present in fewer than 50% of all  
570 samples in the group. We next calculated pN/pS on all the gene sequences that remained in each  
571 of the groups.

572

## 573 **Determination of extracellular genes**

574 To determine extracellular gene groups, we searched the eggNOG v.5 OG database for the words  
575 'secreted' or both words 'extracellular' and 'protein' in their description. We demanded that the  
576 words 'autoinducer', 'expression', 'role' and 'hypothetical' are not in the description to prevent  
577 instances where (a) the OG in question describes a hypothetical protein; and (b) where the OG  
578 produces a secreted particle but is not secreted by itself, as is the case with autoinducer producing  
579 genes. To ensure robust pN/pS calculations, descriptions encompassing 10 OGs or more were  
580 assigned a group name, while descriptions encompassing less than 10 OGs were all grouped  
581 together in one group.

582

## 583 **Calculation of mutation flux in divergent nitrate concentrations**

584 We created matrix  $H^{(U)}$  as follows: Consider a set  $U$  of all genes for which SNP measurements  
585 exist and a subset  $T \subseteq U$  of this set across  $K$  samples. Let  $G^{(T)}_j = (V, E)$  be a codon graph for  
586 subset  $T$  and sample  $j$ , where  $v \in V$  is a codon (e.g., CUU coding for Alanine) and  $(v, v') \in E$  if  
587 and only if  $v$  and  $v'$  are one mutation apart (e.g., CUU for Alanine and CAU for Histidine). Let  
588  $w^{(T)}_j : (v, v') \rightarrow [0,1]$  be a weight function where  $w^{(T)}_j(v, v') =$   
589  $\frac{\text{Number of mutations turning } v \text{ to } v' \text{ in subset } T \text{ and sample } j}{\text{Number of occurrences of codon } v \text{ in subset } T \text{ and sample } j}$ . Let  $H^{(T)}$  be a matrix of dimension  $(|E| \times K)$ ,  
590 where  $H^{(T)}_{(v,v'),j} = w^{(T)}_j(v, v')$ .

591 We next sum-normalized  $H$  per each sample and compared the codon mutation frequencies  
592 between the 40 lowest- and 40 highest-nitrate samples. Despite significant differences in codon  
593 mutation frequencies between low-nitrate and high-nitrate samples, some of the difference could  
594 be driven by the simplex properties of the sum-normalized codon mutation frequencies, and some  
595 could be attributed to the different rates of synonymous mutations between the high- and low-  
596 nitrate groups, which, combined with simplex properties, may affect observed nonsynonymous

597 mutation rates. To address simplex properties, we employed a centered log-ratio (CLR)  
598 normalization on  $H$ . The CLR transformation is a mapping, per codon composition, from the  
599 simplex to a Euclidean vector subspace. This log transforms each value and then centers them  
600 around zero as given below:

$$601 \quad CLR(V) = \left[ \log \frac{v_1}{g(v)}, \dots, \log \frac{v_D}{g(v)} \right] = \log(v) - \log(g(v))$$

602 where  $g(v)$  is the geometric mean of all of the codons.

603 To address differences in rates of the different types of mutations, for each mutation  $(v, v')$  in  
604 the CLR normalized matrix  $H^{(U)}$  we calculated the log odds ratio between the mutation and its  
605 reverse mutation. Namely, we computed mutation flux matrix  $F^{(U)}$  where  $F^{(U)}_{(v,v'),j} =$   
606  $H^{(U)}_{(v,v'),j} - H^{(U)}_{(v',v),j}$ . We compared differences in codon mutation flux between low- and high  
607 nitrate samples using the Mann-Whitney  $U$ -test.

608

### 609 **Calculation of expected random mutation cost per genetic code**

610 Let  $V$  be a genetic code with a set  $V_s \subset V$  of stop codons. Let  $P(v)$  be the abundance of codon  
611  $v \in V$  in a sample and  $P(\text{mut}(v, v'))$  the probability of a single mutation from codon  $v$  to  $v'$ . Let  
612  $c_e: V \times V \rightarrow \mathbf{Z}$  be a cost function for element  $e$ , where:

$$613 \quad c_e(v, v') = \# \text{ of atoms of } e \text{ in } v' - \# \text{ of atoms of } e \text{ in } v$$

614 When testing the random mutation cost on hydrophobicity:

$$615 \quad c_{\text{hyd}}(v, v') = 0 \text{ if } v \text{ and } v' \text{ are both hydrophilic or hydrophobic, } 1 \text{ otherwise}$$

616 With these notations, we define the expected cost of genetic code  $V$  for element  $e$  as follows:

$$617 \quad E[C_e(V)] = \sum_{v, v' \in V} P(v)P(\text{mut}(v, v'))c_e(v, v')$$

618 And the ERMC cost as:

$$619 \quad ERMC_e(V) = \sum_{v,v' \in V} P(v)P(mut(v,v'))c^+_e(v,v')$$

620 Where

$$621 \quad c^+_e = \max(0, c_e)$$

622 We estimate  $ERMC_e(V)$  as follows:

- 623 1. We define  $P(v)$  as the median abundance of all codons  $v'$  coding for the same amino acid  
624 as  $v$ .
- 625 2. We wished to calculate mutation rates in sites that were under minimal selection. To this  
626 end, we estimated  $P(mut(v,v'))$  by calculating, from fourfold-degenerate synonymous  
627 mutation sites the average abundance of each single nucleotide mutation (e.g. A to C)  
628 across all genes in which there are called SNPs in all ocean samples, excluding stop  
629 codons. We then estimate  $P(mut(v,v'))$  using the relative abundances of all pairs of single  
630 nucleotide mutations. We estimate  $P(mut(v,v'))$  for *Prochlorococcus*, *Synechococcus*  
631 and Human genomes using published transition:transversion rates<sup>5,48</sup>.
- 632 3. We calculate  $c$  using information on the amino acids which each codon codes for.

633 To compute a p-value, we generate a null distribution by calculating  $ERMC_e(V)$  for alternative  
634 genetic codes. We randomize the first and second position of all codons, while maintaining that  
635 the two sets of first and second positions in which the stop codons reside are separated by a  
636 single transition mutation.

### 637 **Confounding effects between cost functions for the structure of the genetic code**

638 To confirm that our elemental cost function is not confounded by traditional properties of amino  
639 acids such as the polar requirement (PR) and hydrophathy index<sup>33-36</sup>, we calculated the expected

640 random mutation cost (ERMC), per genetic code, using these common cost functions across 1  
641 million simulated alternative codes. To this end, we randomized the first and second position of  
642 all codons, while maintaining that the two sets of first and second positions in which the stop  
643 codons reside are separated by a single transition mutation. We next calculated a contingency  
644 table for each pair of cost functions for both nitrogen and carbon (i.e.,  $ERMC_N(V):ERMC_{PR}(V)$ ,  
645  $ERMC_N(V):ERMC_{hydrophathy}(V)$ ,  $(V):ERMC_{PR}(V)$ ,  $ERMC_C(V):ERMC_{hydrophathy}(V)$ ). We assign  
646 each code to one of four bins in the following way: (1) surpassing the standard genetic code in  
647 both cost functions (e.g., nitrogen and PR), (2) surpassing the standard genetic code only in  
648 element  $e$  cost (e.g. only nitrogen), (3) surpassing the standard genetic code only in the traditional  
649 cost function (e.g., PR), (4) not surpassing the standard genetic code in neither. Finally, we  
650 applied the Chi-square test of independence with two degrees of freedom to each contingency  
651 table.

652

### 653 **Determination of ‘square’ and ‘diagonal’ arrangements of the nitrogen genetic code**

654 We define a ‘square’ arrangement of the codons coding for nitrogen-rich amino acids histidine,  
655 glutamine, asparagine, lysine and arginine as one where their codons span only two nucleotides  
656 in the first position and two nucleotides in the second position. In the standard genetic code, these  
657 amino acids are coded by CAN, CGN, AAN, AGR, following a square configuration. In contrast,  
658 a ‘diagonal’ arrangement of the codons coding for these amino acids is one where they span all  
659 possible nucleotides in the first position and all possible nucleotides in the second position. For  
660 example, a genetic code where TTY codes for histidine, TTR for glutamine, CCN and AAR for  
661 arginine, GGY for asparagine and GGR for lysine constitutes a ‘diagonal’ arrangement of nitrogen  
662 amino acids. In each of the alternative genetic codes we generated, we tested whether either of  
663 these conditions hold and, if so, designated the code as ‘square’ or ‘diagonal’ accordingly.

664

665 ***Prochlorococcus* and *Synechococcus* genomic data and mutation rates**

666 We downloaded *Prochlorococcus* and *Synechococcus* protein-coding gene sequences (where  
667 available) from the Joint Genome Institute (<https://genome.jgi.doe.gov/portal/>) following  
668 accession numbers published by Berube et al.<sup>5</sup>. To estimate codon relative abundance  $P(v)$ , we  
669 counted and sum-normalized codons in all protein-coding genes for each species. To estimate  
670 codon mutation rate  $P(\text{mut}(v, v'))$  we used the published transition:transversion rate of 2:1 for  
671 *Prochlorococcus* and *Synechococcus*<sup>37</sup>.

672

673 **Multiple taxa ERM calculation**

674 To calculate ERM for 39 taxa across multiple transition:transversion rates, we downloaded  
675 codon usage and GC-content data collected by Athey et al.<sup>49</sup>. We used codon usage counts to  
676 estimate  $P(v)$  and 11 transition:transversion rates (1:5, 1:4, 1:3, 1:2, 2:3, 1:1, 3:2, 2:1, 3:1, 4:1,  
677 5:1) to estimate  $P(\text{mut}(v, v'))$ .



678 **References**

- 679 1. Morris, R. M. *et al.* SAR11 clade dominates ocean surface bacterioplankton communities.  
680 *Nature* **420**, 806–810 (2002).
- 681 2. del Giorgio, P. A. & Duarte, C. M. Respiration in the open ocean. *Nature* **420**, 379–384  
682 (2002).
- 683 3. Sunagawa, S. *et al.* Structure and function of the global ocean microbiome. *Science* **348**,  
684 1261359 (2015).
- 685 4. Mende, D. R. *et al.* Environmental drivers of a microbial genomic transition zone in the  
686 ocean's interior. *Nature Microbiology* **2**, 1367–1373 (2017).
- 687 5. Berube, P. M., Rasmussen, A., Braakman, R., Stepanauskas, R. & Chisholm, S. W.  
688 Emergence of trait variability through the lens of nitrogen assimilation in *Prochlorococcus*.  
689 *Elife* **8**, (2019).
- 690 6. Druffel, E. R. M., Griffin, S., Coppola, A. I. & Walker, B. D. Radiocarbon in dissolved  
691 organic carbon of the Atlantic Ocean. *Geophys. Res. Lett.* **43**, 5279–5286 (2016).
- 692 7. Grzymiski, J. J. & Dussaq, A. M. The significance of nitrogen cost minimization in  
693 proteomes of marine microorganisms. *ISME J.* **6**, 71–80 (2012).
- 694 8. Akashi, H. & Gojobori, T. Metabolic efficiency and amino acid composition in the proteomes  
695 of *Escherichia coli* and *Bacillus subtilis*. *Proc. Natl. Acad. Sci. U. S. A.* **99**, 3695–3700  
696 (2002).
- 697 9. Batut, B., Knibbe, C., Marais, G. & Daubin, V. Reductive genome evolution at both ends of  
698 the bacterial population size spectrum. *Nat. Rev. Microbiol.* **12**, 841–850 (2014).
- 699 10. Biller, S. J. *et al.* Marine microbial metagenomes sampled across space and time. *Sci Data*  
700 **5**, 180176 (2018).
- 701 11. Schloissnig, S. *et al.* Genomic variation landscape of the human gut microbiome. *Nature*  
702 **493**, 45–50 (2013).
- 703 12. McDonald, J. H. & Kreitman, M. Adaptive protein evolution at the *Adh* locus in *Drosophila*.  
704 *Nature* **351**, 652–654 (1991).
- 705 13. Garud, N. R., Good, B. H., Hallatschek, O. & Pollard, K. S. Evolutionary dynamics of  
706 bacteria in the gut microbiome within and across hosts. *PLoS Biol.* **17**, e3000102 (2019).
- 707 14. Price, A. L., Zaitlen, N. A., Reich, D. & Patterson, N. New approaches to population  
708 stratification in genome-wide association studies. *Nat. Rev. Genet.* **11**, 459–463 (2010).
- 709 15. Koonin, E. V. Are There Laws of Genome Evolution? *PLoS Comput. Biol.* **7**, e1002173  
710 (2011).
- 711 16. Kolody, B. C. *et al.* Diel transcriptional response of a California Current plankton  
712 microbiome to light, low iron, and enduring viral infection. *ISME J.* (2019).  
713 doi:10.1038/s41396-019-0472-2
- 714 17. Koonin, E. V. & Novozhilov, A. S. Origin and evolution of the genetic code: the universal

- 715           enigma. *IUBMB Life* **61**, 99–111 (2009).
- 716   18. Hinegardner, R. T. & Engelberg, J. RATIONALE FOR A UNIVERSAL GENETIC CODE.  
717       *Science* **142**, 1083–1085 (1963).
- 718   19. Woese, C. R., Hinegardner, R. T. & Engelberg, J. Universality in the Genetic Code. *Science*  
719       **144**, 1030–1031 (1964).
- 720   20. Woese, C. R. Order in the genetic code. *Proc. Natl. Acad. Sci. U. S. A.* **54**, 71–75 (1965).
- 721   21. Gamow, G. Possible Relation between Deoxyribonucleic Acid and Protein Structures.  
722       *Nature* **173**, 318–318 (1954).
- 723   22. Wong, J. T. A co-evolution theory of the genetic code. *Proc. Natl. Acad. Sci. U. S. A.* **72**,  
724       1909–1912 (1975).
- 725   23. Freeland, S. J. & Hurst, L. D. The genetic code is one in a million. *J. Mol. Evol.* **47**, 238–248  
726       (1998).
- 727   24. Crick, F. H. The origin of the genetic code. *J. Mol. Biol.* **38**, 367–379 (1968).
- 728   25. Massey, S. E. A neutral origin for error minimization in the genetic code. *J. Mol. Evol.* **67**,  
729       510–516 (2008).
- 730   26. Massey, S. E. Genetic code evolution reveals the neutral emergence of mutational  
731       robustness, and information as an evolutionary constraint. *Life* **5**, 1301–1332 (2015).
- 732   27. Massey, S. E. The neutral emergence of error minimized genetic codes superior to the  
733       standard genetic code. *J. Theor. Biol.* **408**, 237–242 (2016).
- 734   28. Novozhilov, A. S. & Koonin, E. V. Exceptional error minimization in putative primordial  
735       genetic codes. *Biol. Direct* **4**, 44 (2009).
- 736   29. Novozhilov, A. S., Wolf, Y. I. & Koonin, E. V. Evolution of the genetic code: partial  
737       optimization of a random code for robustness to translation error in a rugged fitness  
738       landscape. *Biol. Direct* **2**, 24 (2007).
- 739   30. Salinas, D. G., Gallardo, M. O. & Osorio, M. I. Local conditions for global stability in the  
740       space of codons of the genetic code. *Biosystems.* **150**, 73–77 (2016).
- 741   31. Torabi, N., Goodarzi, H. & Shateri Najafabadi, H. The case for an error minimizing set of  
742       coding amino acids. *J. Theor. Biol.* **244**, 737–744 (2007).
- 743   32. Zhu, W. & Freeland, S. The standard genetic code enhances adaptive evolution of proteins.  
744       *J. Theor. Biol.* **239**, 63–70 (2006).
- 745   33. de Oliveira, L. L., de Oliveira, P. S. L. & Tinós, R. A multiobjective approach to the genetic  
746       code adaptability problem. *BMC Bioinformatics* **16**, 52 (2015).
- 747   34. Di Giulio, M. & Medugno, M. The level and landscape of optimization in the origin of the  
748       genetic code. *J. Mol. Evol.* **52**, 372–382 (2001).
- 749   35. Higgs, P. G. A four-column theory for the origin of the genetic code: tracing the evolutionary  
750       pathways that gave rise to an optimized code. *Biol. Direct* **4**, 16 (2009).

- 751 36. Sengupta, S. & Higgs, P. G. Pathways of Genetic Code Evolution in Ancient and Modern  
752 Organisms. *J. Mol. Evol.* **80**, 229–243 (2015).
- 753 37. Urbach, E., Scanlan, D. J., Distel, D. L., Waterbury, J. B. & Chisholm, S. W. Rapid  
754 Diversification of Marine Picophytoplankton with Dissimilar Light-Harvesting Structures  
755 Inferred from Sequences of Prochlorococcus and Synechococcus (Cyanobacteria). *Journal*  
756 *of Molecular Evolution* **46**, 188–201 (1998).
- 757 38. Hopfield, J. J. Origin of the genetic code: a testable hypothesis based on tRNA structure,  
758 sequence, and kinetic proofreading. *Proc. Natl. Acad. Sci. U. S. A.* **75**, 4334–4338 (1978).
- 759 39. Yarus, M., Widmann, J. J. & Knight, R. RNA–Amino Acid Binding: A Stereochemical Era for  
760 the Genetic Code. *J. Mol. Evol.* **69**, 406 (2009).
- 761 40. Freeland, S. J., Knight, R. D., Landweber, L. F. & Hurst, L. D. Early fixation of an optimal  
762 genetic code. *Mol. Biol. Evol.* **17**, 511–518 (2000).
- 763 41. Huerta-Cepas, J. *et al.* Fast Genome-Wide Functional Annotation through Orthology  
764 Assignment by eggNOG-Mapper. *Mol. Biol. Evol.* **34**, 2115–2122 (2017).
- 765 42. Kanehisa, M. & Goto, S. KEGG: kyoto encyclopedia of genes and genomes. *Nucleic Acids*  
766 *Res.* **28**, 27–30 (2000).
- 767 43. Zeevi, D. *et al.* Structural variation in the gut microbiome associates with host health.  
768 *Nature* **568**, 43–48 (2019).
- 769 44. 1000 Genomes Project Consortium *et al.* A map of human genome variation from  
770 population-scale sequencing. *Nature* **467**, 1061–1073 (2010).
- 771 45. Huerta-Cepas, J. *et al.* eggNOG 5.0: a hierarchical, functionally and phylogenetically  
772 annotated orthology resource based on 5090 organisms and 2502 viruses. *Nucleic Acids*  
773 *Res.* **47**, D309–D314 (2019).
- 774 46. Schlitzer, R. *et al.* The GEOTRACES Intermediate Data Product 2017. *Chem. Geol.* **493**,  
775 210–223 (2018).
- 776 47. Honaker, J., King, G., Blackwell, M. & Others. Amelia II: A program for missing data. *J.*  
777 *Stat. Softw.* **45**, 1–47 (2011).
- 778 48. Wang, J., Raskin, L., Samuels, D. C., Shyr, Y. & Guo, Y. Genome measures used for  
779 quality control are dependent on gene function and ancestry. *Bioinformatics* **31**, 318–323  
780 (2015).
- 781 49. Athey, J. *et al.* A new and updated resource for codon usage tables. *BMC Bioinformatics*  
782 **18**, 391 (2017).

783

784

785

786

787

788 **Supplementary Material**

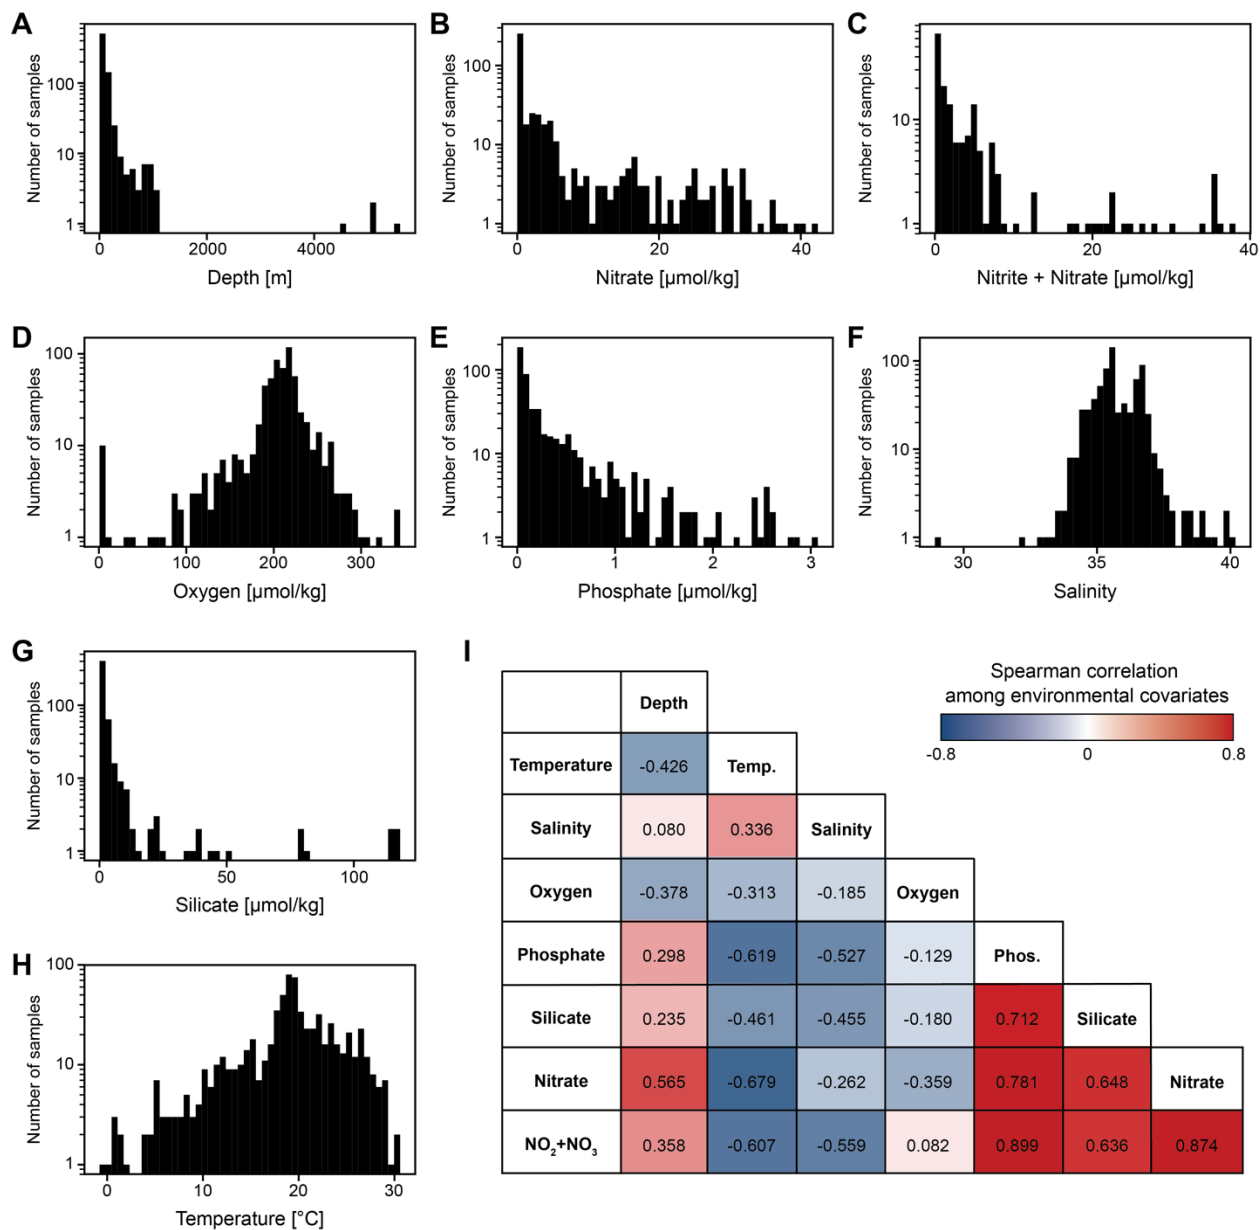

789

790 **Figure S1.** (A-H) Distribution of measurements taken alongside marine microbial samples for depth  
 791 (A), nitrate (B), nitrate and nitrite (C), oxygen (D), phosphate (E), salinity (F), silicate (G) and  
 792 temperature (H). (I) Spearman correlation coefficients between all pairs of environmental  
 793 measurements across all available samples.

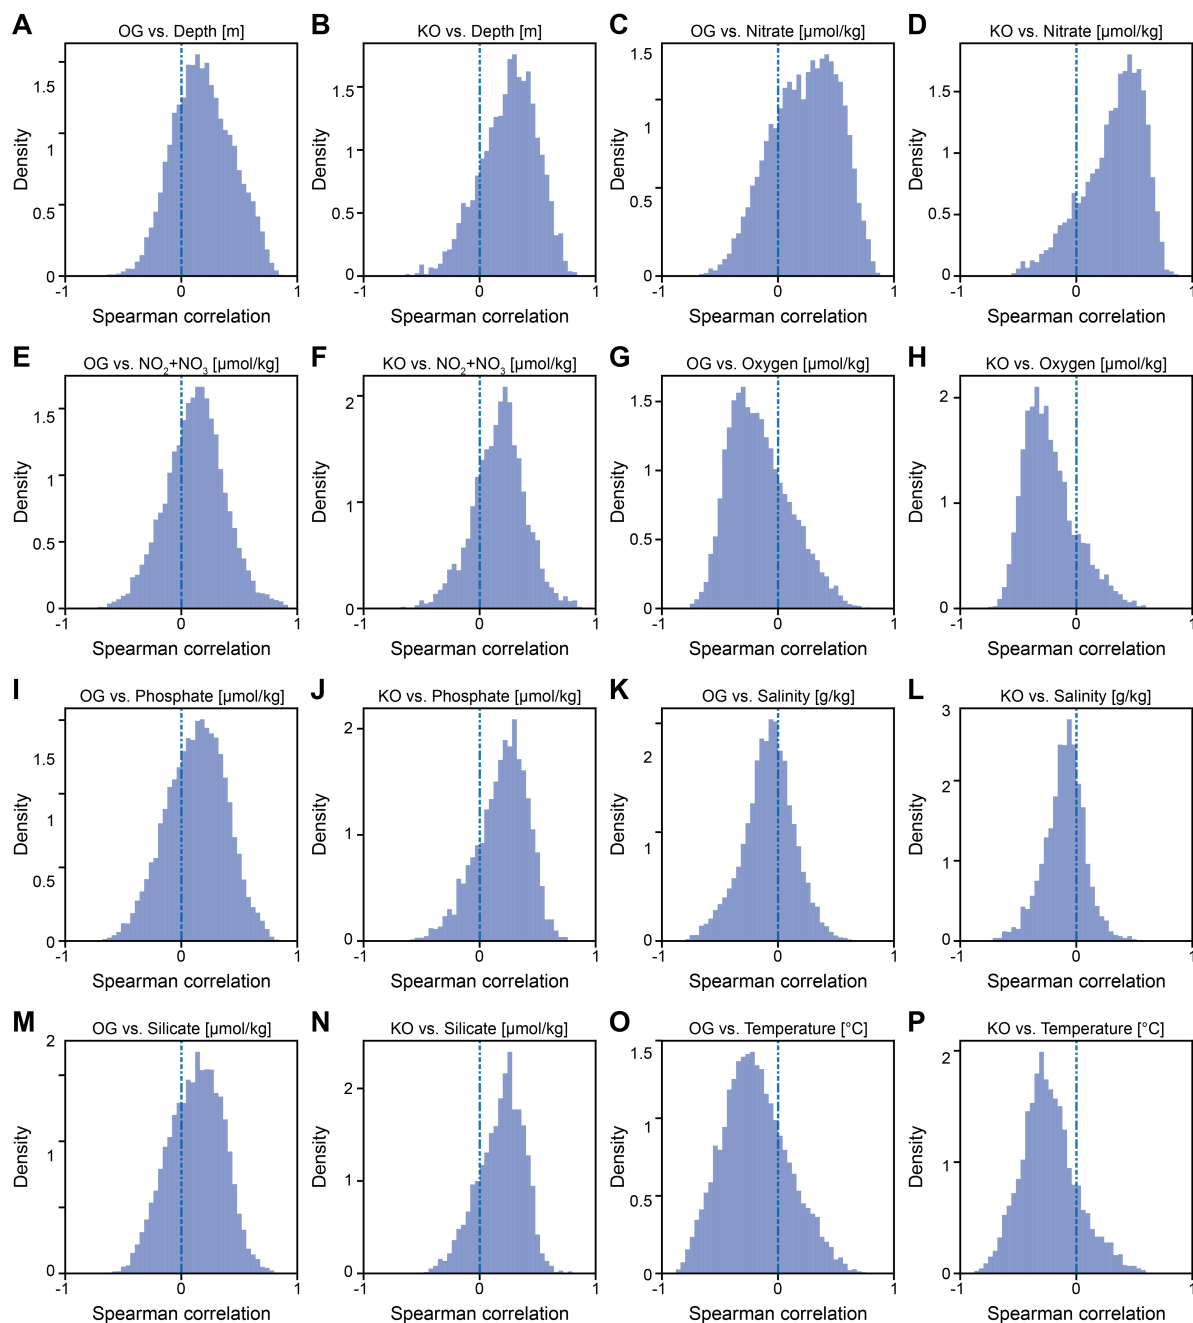

794

795 **Figure S2.** (A-P) Histograms of Spearman correlations between  $\pi_{\text{within}}$  (red) or pN/pS rates (blue) and  
796 environmental variables, for both KEGG KOs and eggNOG OGs. Panels A, C, E, G, I, K, M and O  
797 depict correlations between OG calculated parameters and depth, nitrate, nitrite and nitrite, oxygen,  
798 phosphate, salinity, silicate and temperature, respectively. Panels B, D, F, H, J, L, N and P depict  
799 correlations between KO calculated parameters and depth, nitrate, nitrite and nitrite, oxygen,  
800 phosphate, salinity, silicate and temperature, respectively.

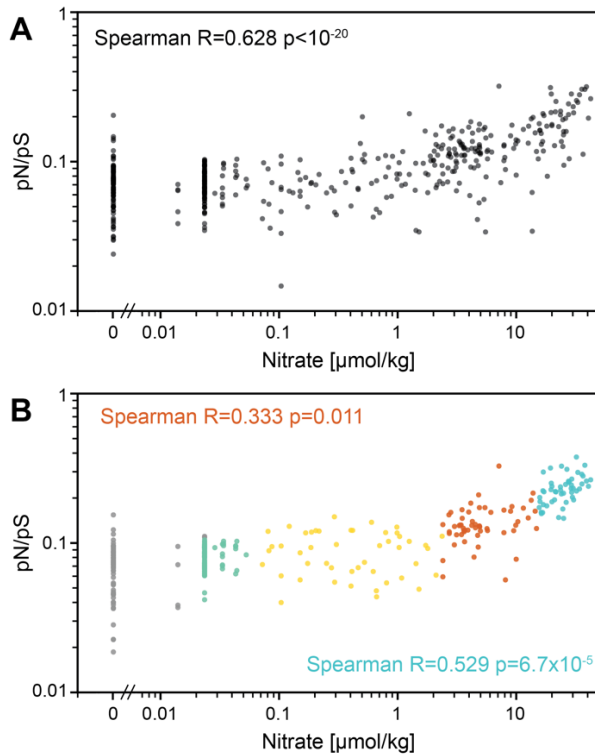

801

802 **Figure S3.** (A,B) Scatter plot of the association of pN/pS genes from genus *Synechococcus* with  
803 environmental concentrations of nitrate (A) for all *synechococcus* genes and (B) for genes present in  
804 over 50% in nitrate strata.

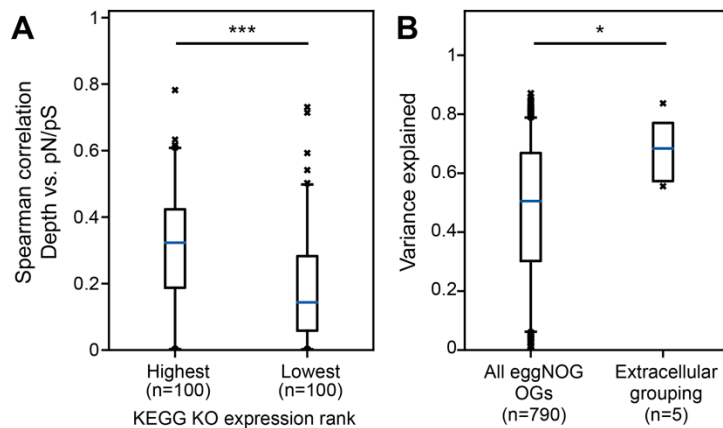

805

806 **Figure S4.** (A, B) Box plots (line, median; box, IQR; whiskers, 5th and 95th percentiles) of (A)  
807 Spearman correlation coefficients between depth and pN/pS in highly expressed (left) and lowly  
808 expressed (right) KEGG KOs. (B) Spearman correlation coefficients between depth and pN/pS in  
809 highly expressed (left) and lowly expressed (right) KEGG KOs. Variance explained by the environment  
810 in extracellular gene groups versus all eggNOG OGs (Methods). \*,  $P < 0.05$ ; \*\*\*,  $P < 10^{-5}$ .

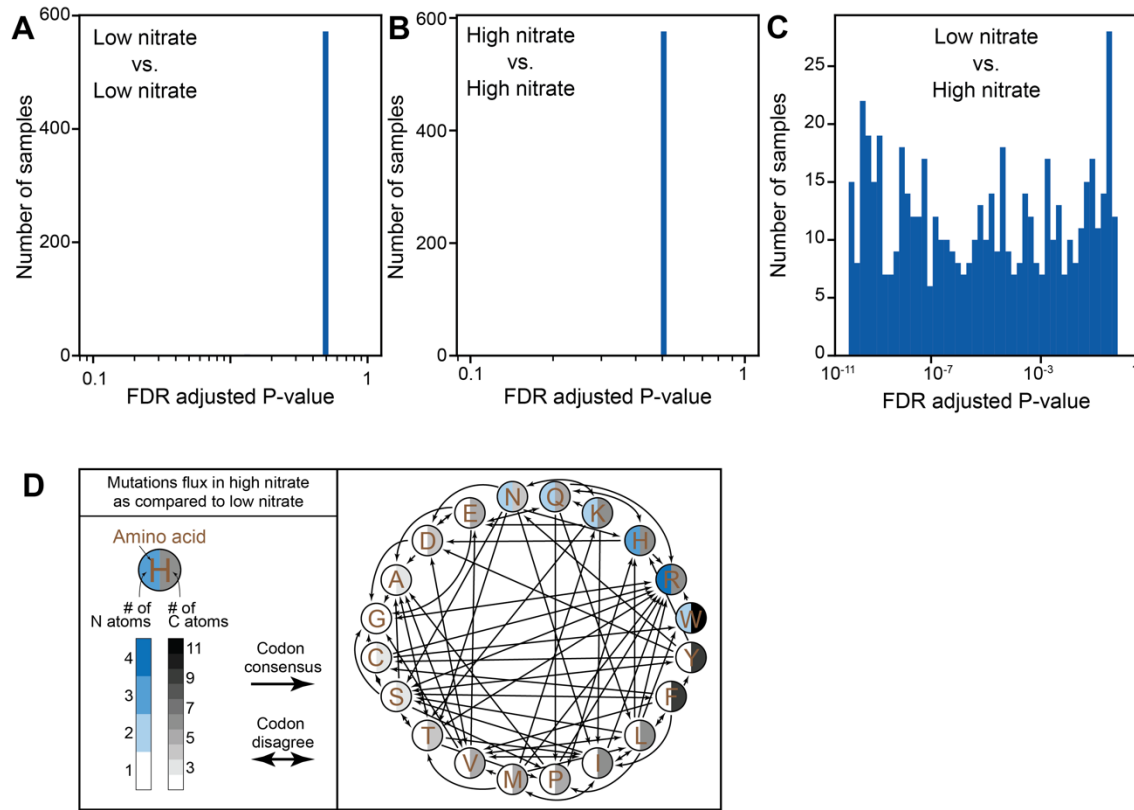

811

812 **Figure S5.** (A-C) Histograms of the distribution of P-values of codon-to-codon mutations compared  
813 between (A) 40 low-nitrate samples and 40 other low-nitrate samples selected randomly out of the 80  
814 lowest-nitrate samples; (B) 40 high-nitrate samples and 40 other high-nitrate samples selected  
815 randomly out of the 80 highest-nitrate samples; (C) 40 low-nitrate samples and 40 high-nitrate samples  
816 selected randomly out of the 80 lowest and highest nitrate samples. (D) Depiction of mutations  
817 common in high versus low environmental nitrate concentrations. Two edged arrows mark amino-  
818 acids in which some codon mutations were more common in high-nitrate but the opposite codon  
819 mutation was more common in low-nitrate.

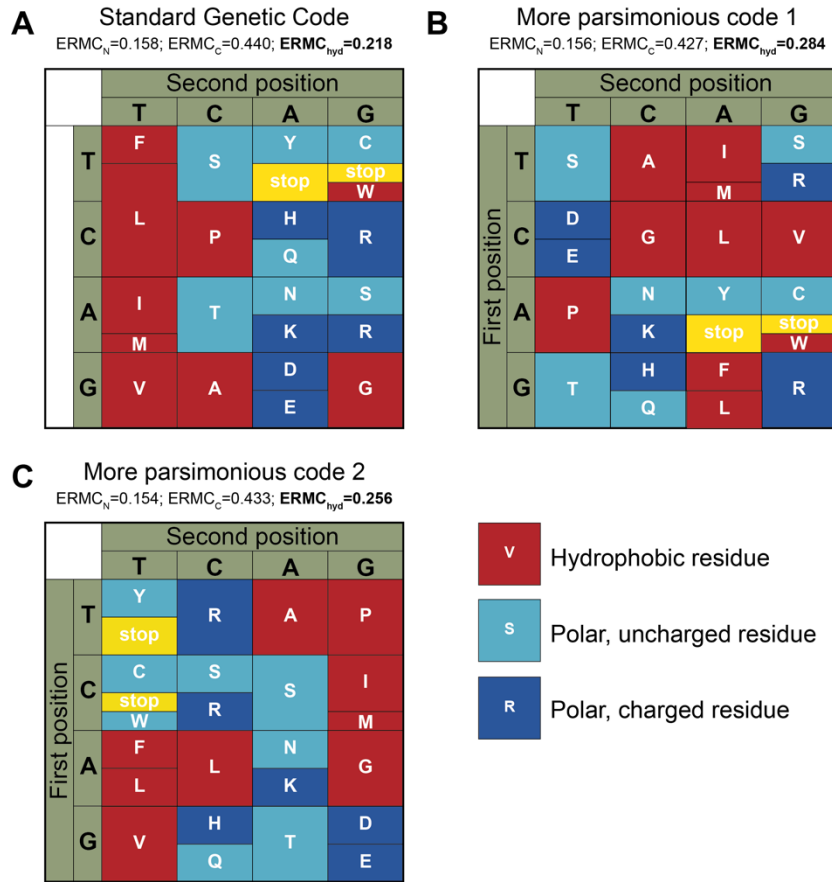

821 **Figure S6.** (A-C) Hydrophobic or hydrophilic properties of different amino acids depicted across their  
 822 positions in (A) the standard genetic code, (B+C) two permutations of the standard genetic code that  
 823 were more conservative in terms of nitrogen and carbon ERMC.



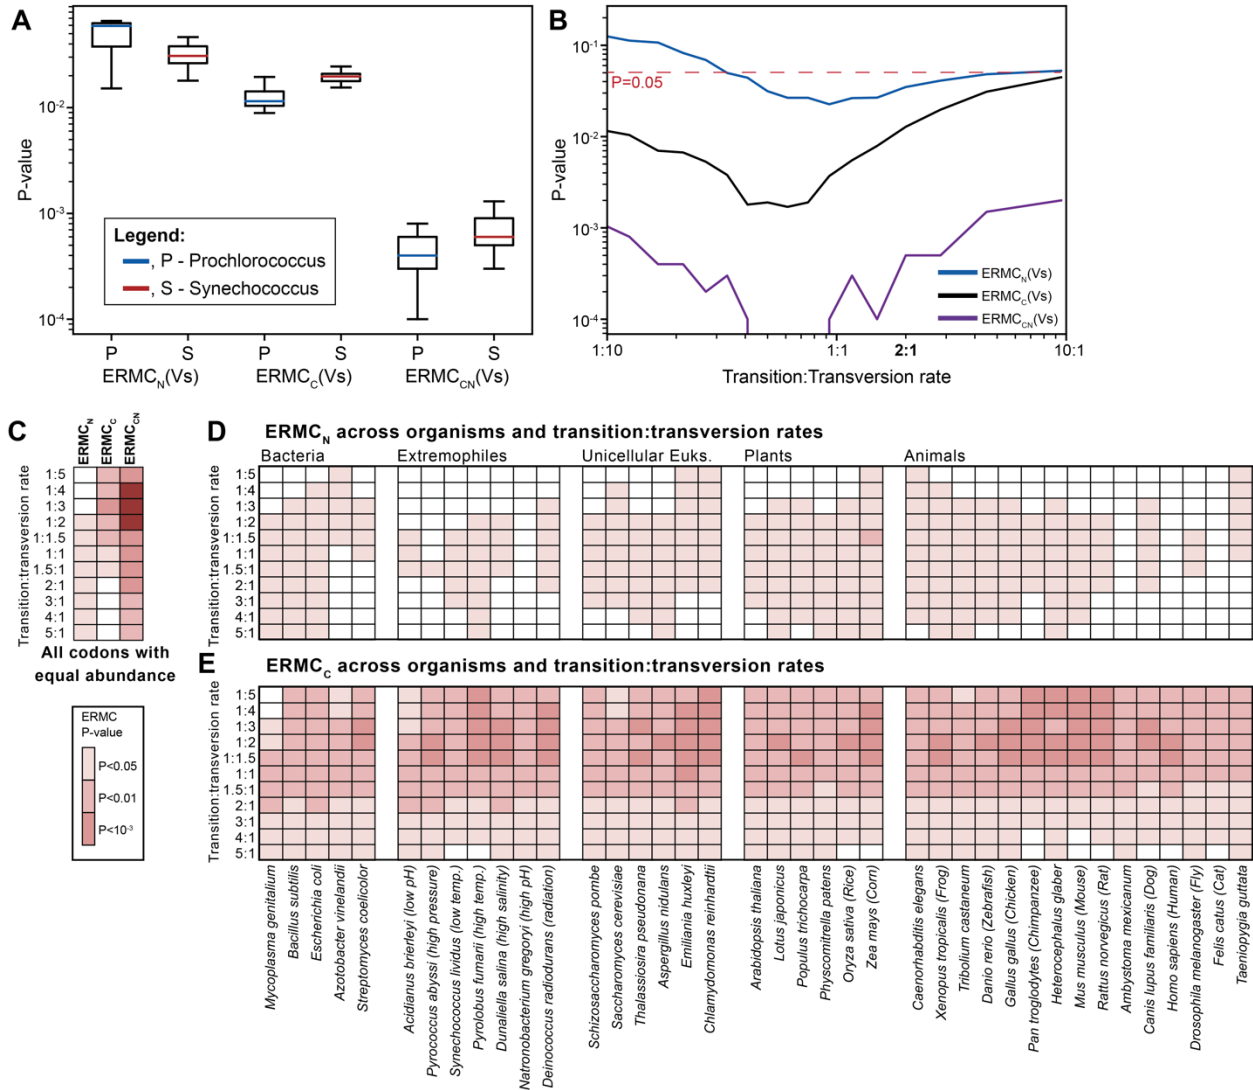

824

825 **Figure S7.** (A) Box plots (line, median; box, IQR; whiskers, 5th and 95th percentiles) of P-values for  
 826 the ERM of the standard genetic code for nitrogen (left), carbon (center) and both (right) across 187  
 827 *Prochlorococcus* (P, blue) and *Synechococcus* (S, red) strains. (B) P-values for the ERM of the  
 828 standard genetic code for nitrogen (blue), carbon (black) and both (purple) across a wide range of  
 829 transition:transversion rates, calculated using combined codon abundance of 187 *Prochlorococcus*  
 830 and *Synechococcus* strains. (C) Heat map of ERM P-values for nitrogen, carbon and both, for a  
 831 theoretical case in which all codons are of the same abundance. (D,E) Same as Fig. 3C for ERM<sub>N</sub>  
 832 (D) and ERM<sub>C</sub> (E) P-values.

| Cost function a | Cost function b | Sign a | Sign b | Alternative code counts | Chi-squared P-value |
|-----------------|-----------------|--------|--------|-------------------------|---------------------|
| n+              | c+              | <      | <      | 128                     | 1.32E-03            |
|                 |                 |        | >=     | 14106                   |                     |
|                 |                 | >=     | <      | 11802                   |                     |
|                 |                 |        | >=     | 973964                  |                     |
| n+              | hyd             | <      | <      | 270                     | 2.71E-04            |
|                 |                 |        | >=     | 13964                   |                     |
|                 |                 | >=     | <      | 14953                   |                     |
|                 |                 |        | >=     | 970813                  |                     |
| n+              | pr              | <      | <      | 83                      | 4.68E-16            |
|                 |                 |        | >=     | 14151                   |                     |
|                 |                 | >=     | <      | 13646                   |                     |
|                 |                 |        | >=     | 972120                  |                     |
| c+              | hyd             | <      | <      | 249                     | 4.86E-07            |
|                 |                 |        | >=     | 11681                   |                     |
|                 |                 | >=     | <      | 14974                   |                     |
|                 |                 |        | >=     | 973096                  |                     |
| c+              | pr              | <      | <      | 442                     | 4.29E-107           |
|                 |                 |        | >=     | 11488                   |                     |
|                 |                 | >=     | <      | 13287                   |                     |
|                 |                 |        | >=     | 974783                  |                     |

833

834 **Table S1.** Contingency tables for each pair of cost functions for both nitrogen (n+) and carbon (c+),  
835 compared to PR (pr) and Hydropathy index (hyd), across 1 million simulated genetic codes. Each code  
836 is assigned to one of four bins: (1) surpassing the standard genetic code in both cost functions (<; <),  
837 (2) surpassing the standard genetic code only in element e cost (<; >=), (3) surpassing the standard  
838 genetic code only in the traditional cost function (>=; <), (4) not surpassing the standard genetic code  
839 in neither (>=; >=). Chi-square test of independence was applied to each contingency table.
